# Supplementary material for: Hazardous Effect of Low-Dose Aspirin in Patients with Predialysis Advanced Chronic Kidney Disease Assessed by Machine Learning Method Feature Selection
Source: MDPI journal article supplement (doi:10.3390/healthcare9111484), 2021-10-31
Supplement: s1 [file s1]

Table S1. Code for disease

|                             | ICD-9-CM                                            | ICD-10-CM                                                                                                                                                                                           |
|-----------------------------|-----------------------------------------------------|-----------------------------------------------------------------------------------------------------------------------------------------------------------------------------------------------------|
| <b><i>Comorbidities</i></b> |                                                     |                                                                                                                                                                                                     |
| Hypertension                | 401 – 405                                           | I10-14                                                                                                                                                                                              |
| Diabetes mellitus           | 250                                                 | E10-E14                                                                                                                                                                                             |
| Hyperlipidemia              | 272.0–272.4                                         | E78                                                                                                                                                                                                 |
| CAD                         | 410 – 414                                           | I20-I25                                                                                                                                                                                             |
| CHF                         | 428.0, 428.1, 428.9                                 | I50                                                                                                                                                                                                 |
| Stroke                      | 430–438                                             | I60- I63, I65-I69, G45-G46                                                                                                                                                                          |
| PVD                         | 250.7, 440.2-3,440.8-9,<br>443,444.22,444.8,447.8-9 | E08.51-52, E08.59, E09.51-52, E09.59, E10.51-52,<br>E10.59, E11.51-52, E11.59, E13.51-52, E13.59, I70.2-<br>I70.9, I73, I74.2-I74.9, I75.011-I75.029, I75.89, I77.3,<br>I77.89, I77.9, I79.1, I79.8 |
| COPD                        | 490–492, 496                                        | J40-J44, J47                                                                                                                                                                                        |
| Cancer                      | 140-208                                             | C00.0-C96.9                                                                                                                                                                                         |
| Atrial fibrillation         | 427.31                                              | I48                                                                                                                                                                                                 |
| <b><i>CCI score</i></b>     |                                                     |                                                                                                                                                                                                     |
| Myocardial infarct          | 410                                                 | I21-22                                                                                                                                                                                              |
| Congestive heart failure    | 428.0, 428.1, 428.9                                 | I50                                                                                                                                                                                                 |

|                                     |                                                                                                                                            |                                                                                                                                                                                                                                                                                                                                                                                                                                                                                                                                                     |
|-------------------------------------|--------------------------------------------------------------------------------------------------------------------------------------------|-----------------------------------------------------------------------------------------------------------------------------------------------------------------------------------------------------------------------------------------------------------------------------------------------------------------------------------------------------------------------------------------------------------------------------------------------------------------------------------------------------------------------------------------------------|
| Cerebrovascular disease             | 430–438                                                                                                                                    | I60- I63, I65-I69, G45-G46                                                                                                                                                                                                                                                                                                                                                                                                                                                                                                                          |
| Connective tissue disease           | 710,714,725                                                                                                                                | M05, M06, M32, M33.20, M33.29, M34, M35.3<br>E08.51-52, E08.59, E09.51-52, E09.59, E10.51-52,<br>E10.59, E11.51-52, E11.59, E13.51-52, E13.59, I70.2-<br>I70.9, I73, I74.2-I74.9, I75.011-I75.029, I75.89, I77.3,<br>I77.89, I77.9, I79.1, I79.8                                                                                                                                                                                                                                                                                                    |
| Peripheral vascular<br>disease      | 250.7, 440.2-3,440.8-9,<br>443,444.22,444.8,447.8-9                                                                                        |                                                                                                                                                                                                                                                                                                                                                                                                                                                                                                                                                     |
| Dementia                            | 290                                                                                                                                        | F03.90, F05, F01.50, F01.51                                                                                                                                                                                                                                                                                                                                                                                                                                                                                                                         |
| COPD                                | 490–492, 496                                                                                                                               | J40-J44, J47                                                                                                                                                                                                                                                                                                                                                                                                                                                                                                                                        |
| Ulcer disease                       | 531.XX, 532.XX, 533.XX ,534.XX                                                                                                             | K25.X, K26.X, K27.X, K28.X, K31.82, K56.60                                                                                                                                                                                                                                                                                                                                                                                                                                                                                                          |
| Mild liver disease                  | 571.2,571.4X,571.5,571.6                                                                                                                   | K70.2, K70.3X, K73.X, K74.X, K74.60, K74.69, K75.4                                                                                                                                                                                                                                                                                                                                                                                                                                                                                                  |
| Hemiplegia                          | 342                                                                                                                                        | G81<br>E10.21, E11.21, N03.0, N03.1, N03.2, N03.3, N03.4,<br>N03.5 N03.6, N03.7, N03.8, N03.9, N05.0, N05.1,<br>N05.2, N05.3, N05.4, N05.5, N05.6, N05.7, N05.8, N05.9,<br>N06.0, N06.1, N06.2, N06.3, N06.4, N06.5, N06.6, N06.7,<br>N06.8, N06.9, N07.0, N07.1, N07.2, N07.3, N07.4, N07.5,<br>N07.6, N07.7, N07.8, N07.9,<br>N08, N14.0, N14.1, N14.2, N14.3, N14.4, N15.0, N15.8,<br>N15.9, N16, N17.1, N17.2, N18.4, N18.5,<br>N18.6, N18.9, N19, N25.0, N25.1, N25.81, N25.89, N25.9<br>E08.311, E08.319, E08.321, E08.329, E08.331, E08.339, |
| Moderate-to-severe renal<br>disease | 582.0,582.1,582.2,582.4,582.81,582.89,582.9,583.0,<br>583.1,583.2,583.4,583.6,583.7,583.9,588.1,588.8,<br>588.9, 583.81,583.89,585,586,588 |                                                                                                                                                                                                                                                                                                                                                                                                                                                                                                                                                     |
| Diabetes-with-end-organ-            | 250.4,250.5,250.6                                                                                                                          |                                                                                                                                                                                                                                                                                                                                                                                                                                                                                                                                                     |

|                                  |                                                                             |                                                                                                                                                                                                                                                                                                                                                                                                                                                                                                                                                                                                                                     |
|----------------------------------|-----------------------------------------------------------------------------|-------------------------------------------------------------------------------------------------------------------------------------------------------------------------------------------------------------------------------------------------------------------------------------------------------------------------------------------------------------------------------------------------------------------------------------------------------------------------------------------------------------------------------------------------------------------------------------------------------------------------------------|
| damage                           |                                                                             | E08.341, E08.349, E08.351, E08.359, E08.36, E08.39, E09.311, E09.319, E09.321, E09.329, E09.331, E09.339, E09.341, E09.349, E09.351, E09.359, E09.36, E09.39, E10.21, E10.22, E10.29, E10.311, E10.319, E10.36, E10.39, E10.40, E10.41, E10.44, E10.49, E10.610, E10.65, E11.21, E11.22, E11.29, E11.311, E11.319, E11.321, E11.329, E11.331, E11.339, E11.341, E11.349, E11.351, E11.359, E11.36, E11.39, E11.40, E11.41, E11.42, E11.43, E11.44, E11.49, E11.65, E13.21, E13.22, E13.29, E13.311, E13.319, E13.321, E13.329, E13.331, E13.339, E13.341, E13.349, E13.351, E13.359, E13.36, E13.39, E13.42, E13.43, E13.44, E13.49 |
| Malignancy                       | 140-149,150-159,160-165,170,174,175,176,179,180-189,190-195,200-201,203-208 | C00-C96,D45, D47.Z9, E31.22, Z51.12                                                                                                                                                                                                                                                                                                                                                                                                                                                                                                                                                                                                 |
| Moderate or severe liver disease | 456.0,456.1,456.20,572.X,456.21,I85.XX,                                     | K72.10,K72.11,K72.90,K72.91,K766,K767,K768.1                                                                                                                                                                                                                                                                                                                                                                                                                                                                                                                                                                                        |
| Metastatic solid tumors          | 196.X,197.X,198.X, 198.8X,199.X                                             | C45.9, C77.X, C78, C79, C7A.00, C7A.094, C7A.095, C7A.096, C7A.1, C7A.8, C7B, C80.0, C80.1, D3A.8, J91.0, R18.0, Z51.12                                                                                                                                                                                                                                                                                                                                                                                                                                                                                                             |
| AIDS                             | 0.42,0.43,0.44                                                              | B20                                                                                                                                                                                                                                                                                                                                                                                                                                                                                                                                                                                                                                 |
| <b><i>Clinical outcomes</i></b>  |                                                                             |                                                                                                                                                                                                                                                                                                                                                                                                                                                                                                                                                                                                                                     |
| GI bleeding (with                | 530.7,530.82, 531-535,537.83,578                                            | K25-K29, K31.811, K31.82, K92                                                                                                                                                                                                                                                                                                                                                                                                                                                                                                                                                                                                       |
