# Supplementary material for: Hazardous Effect of Low-Dose Aspirin in Patients with Predialysis Advanced Chronic Kidney Disease Assessed by Machine Learning Method Feature Selection
Source: MDPI journal article supplement (doi:10.3390/healthcare9111484), 2021-10-31
Supplement: s1 [file s1]

Table S3. Ranking of feature selection on entering dialysis and death before entering dialysis in the patients with advanced CKD

| Feature selection  | Entering dialysis |         |              |               | Death before Entering dialysis |         |              |               |
|--------------------|-------------------|---------|--------------|---------------|--------------------------------|---------|--------------|---------------|
|                    | LGR (16)*         | RF (15) | Xgboost (15) | Average score | LGR (15)                       | RF (22) | Xgboost (10) | Average score |
| Age                | 15                | 20      | 14           | 16.3          | 14                             | 22      | 10           | 15.3          |
| Sex                | 9                 | 15      | 5            | 9.7           | 0                              | 21      | 0            | 7.0           |
| CCI score          | 16                | 19      | 15           | 16.7          | 15                             | 12      | 9            | 12.0          |
| Hypertension       | 14                | 11      | 12           | 12.3          | 0                              | 15      | 0            | 5.0           |
| CAD                | 0                 | 5       | 0            | 1.7           | 6                              | 17      | 0            | 7.7           |
| Diabetes           | 1                 | 8       | 10           | 6.3           | 8                              | 18      | 4            | 10.0          |
| Hyperlipidemia     | 5                 | 7       | 8            | 6.7           | 1                              | 16      | 0            | 5.7           |
| CHF                | 11                | 4       | 6            | 7.0           | 4                              | 20      | 3            | 9.0           |
| Stroke             | 4                 | 2       | 1            | 2.3           | 0                              | 14      | 0            | 4.7           |
| PVD                | 0                 | 0       | 0            | 0.0           | 0                              | 13      | 0            | 4.3           |
| COPD               | 0                 | 1       | 2            | 1.0           | 0                              | 19      | 0            | 6.3           |
| Cancer             | 10                | 0       | 11           | 7.0           | 10                             | 1       | 6            | 5.7           |
| Af                 | 0                 | 0       | 0            | 0.0           | 0                              | 2       | 0            | 0.7           |
| ACEI/ARB           | 0                 | 0       | 0            | 0.0           | 0                              | 5       | 0            | 1.7           |
| $\beta$ -blocker   | 0                 | 9       | 4            | 4.3           | 0                              | 11      | 0            | 3.7           |
| CCB                | 12                | 12      | 9            | 11.0          | 11                             | 10      | 7            | 9.3           |
| Potassium diuretic | 7                 | 0       | 3            | 3.3           | 7                              | 4       | 1            | 4.0           |

|                       |    |    |    |      |    |   |   |      |
|-----------------------|----|----|----|------|----|---|---|------|
| Insulin               | 6  | 5  | 0  | 3.7  | 5  | 8 | 0 | 4.3  |
| Lipid-lowering agents | 8  | 11 | 7  | 8.7  | 9  | 3 | 2 | 4.7  |
| Nonselective NSAID    | 0  | 0  | 0  | 0.0  | 2  | 6 | 0 | 2.7  |
| Selective NSAID       | 2  | 0  | 0  | 0.7  | 3  | 7 | 0 | 3.3  |
| Acetaminophen         | 13 | 13 | 13 | 13.0 | 13 | 9 | 8 | 10.0 |
| Aspirin               | 3  | 3  | 0  | 2.0  | 12 | 0 | 5 | 5.7  |

Abbreviation: CKD: chronic kidney disease; CCI: Charlson comorbidity index; CAD: coronary artery disease; CHF: congestive heart failure, PVD: peripheral vascular disease; COPD: chronic obstructive pulmonary disease; Af: atrial fibrillation; ACEI: angiotensin converting enzyme inhibitors; ARB: angiotensin receptor blocker; CCB: calcium channel blocker; NSAID: non-steroidal anti-inflammatory drug; LGR: logistic regression; RF: random forest; XGboost: eXtreme Gradient Boosting.

\*16 important factors were determined by LGR method, which the higher score indicates that factor has more importance on determining the clinical outcome. We performed the feature selection in the method of RF and XGboost by the same manner.
