# Supplementary material for: Hazardous Effect of Low-Dose Aspirin in Patients with Predialysis Advanced Chronic Kidney Disease Assessed by Machine Learning Method Feature Selection
Source: MDPI journal article supplement (doi:10.3390/healthcare9111484), 2021-10-31
Supplement: s1 [file s1]

Table S2. Code for drugs

| Drug type            | ATC classification system codes              | Drug name                                                                                                                                                                                                        |
|----------------------|----------------------------------------------|------------------------------------------------------------------------------------------------------------------------------------------------------------------------------------------------------------------|
| ACEI/ARB             | C09A, C09B, C09C, C09D                       | Captopril, Enalapril, Lisinopril, Perindopril, Ramipril, Quinapril, Benazepril, Cilazapril, Fosinopril, Imidapril, Losartan, Eprosartan, Valsartan, Irbesartan, Candesartan, Telmisartan, Olmesartan, Azilsartan |
| Beta blocking agents | C07A, C07B, C07CA03, C07DA06                 | Alprenolol, Oxprenolol, Pindolol, Propranolol, Timolol, Sotalol, Nadolol, Carteolol, Bupranolol, Metoprolol, Atenolol, Acebutolol, Betaxolol, Bevantolol, Bisoprolol, Esmolol, Nebivolol, Labetalol, Carvedilol  |
| CCB                  | C08C, C08D, C08E, C09BB, C09DB, C09DX, C10BX | Amlopidine, Felodipine, Isradipine, Nicardipine, Nifedipine, Nimodipine, Nisoldipine, Nitrendipine, Lacidipine, Barnidipine, Lercanidipine, Cilnidipine, Benidipine, Verapamil, Diltiazem                        |
| Potassium diuretic   | C03DA, C03DB, C03EA                          | Potassium canrenoate, Spironolactone, Eplerenone, Amiloride, Triamterene                                                                                                                                         |
| Biguanides           | A10BA, A10BD                                 | Metformin, Buformin                                                                                                                                                                                              |
| Insulin              | A10A                                         | Insulin                                                                                                                                                                                                          |
| Statin               | C10AA                                        | Simvastatin, Lovastatin, Pravastatin, Fluvastatin, Atorvastatin, Rosuvastatin, Pitavastatin                                                                                                                      |

|                                                                                                                                                                                                     |                                |                                                                                                                                                                                                                                                                                                                                |
|-----------------------------------------------------------------------------------------------------------------------------------------------------------------------------------------------------|--------------------------------|--------------------------------------------------------------------------------------------------------------------------------------------------------------------------------------------------------------------------------------------------------------------------------------------------------------------------------|
| Nonselective NSAID                                                                                                                                                                                  | M01AB, M01AE, M01AG, M01AX     | Indomethacin, sulindac, tolmetin, diclofenac, alclofenac, etodolac, acetaminophen, ketorolac, aceclofenac, ibuprofen, naproxen, ketoprofen, fenoprofen, fenbufen, flurbiprofen, tiaprofenic acid, alminoprofen, mefenamic acid, tolfenamic acid, flufenamic acid, meclofenamic acid, niflumic acid, benzydamine, tiaramide Hcl |
| Selective NSAID                                                                                                                                                                                     | M01AC, M01AH, M01AX01, M01AX17 | piroxicam, piroxicam, tenoxicam, meloxicam, celecoxib, rofecoxib, etoricoxib, nabumetone, nimesulide                                                                                                                                                                                                                           |
| Acetaminophen                                                                                                                                                                                       | N02BE                          | paracetamol                                                                                                                                                                                                                                                                                                                    |
| Abbreviation:                                                                                                                                                                                       |                                |                                                                                                                                                                                                                                                                                                                                |
| ATC: anatomical therapeutic chemical; ACEI/ARB: Angiotensin-converting enzyme inhibitors/ Angiotensin receptor blockers; CCB: Calcium channel blockers; NSAID: Non-Steroidal Anti-Inflammatory Drug |                                |                                                                                                                                                                                                                                                                                                                                |
